# Supplementary material
Source: publisher figshare collection journal article supplement (https://tandf.figshare.com/articles/dataset/_/21829281)
Supplement: Supplementary file 1 [file 1]

Skoncentrowana na traumie poznawczo-behawioralna terapia dziewczyny pochodzącej z grupy uchodźców: studium przypadku.

Johanna Unterhitzenberger, Rita Rosner

**Wprowadzenie:** Nie ma jasności co do tego, czy młodzi uchodźcy po traumie powinni być poddawani psychoterapii uwarunkowanej kulturowo czy też ich terapia powinna bazować na opartych na danych naukowych metodach terapeutycznych.

**Cel:** W pracy tej opisano leczenie dziewczyny pochodzącej z grupy uchodźców cierpiącej na PTSD, która została poddana skoncentrowanej na traumie psychoterapii poznawczo-behawioralnej (TF-CBT; Cohen, Mannarino, & Deblinger, 2006).

**Metoda:** Zaprezentowano studium przypadku 17 letniej dziewczyny oraz jej opiekuna z wschodniej Afryki, przybyłych do Niemiec i cierpiących na PTSD z powodu doświadczenia wielu zdarzeń traumatycznych.

**Wyniki:** Dziewczyna ta uczestniczyła w 12 sesjach TF-CBT; podobnie jak jej opiekun.

Zaobserwowano istotne zmniejszenie się symptomów PTSD wśród nich oraz utrzymywanie się poprawy przez następne 6 miesięcy.

**Konkluzje:** Zaprezentowana forma terapii okazała się być skutecznym sposobem leczenia PTSD wśród uchodźców, z uwzględnieniem ich specyfiki kulturowej.

**Keywords:** uchodźca, poszukiwania schronienia, odseparowany, adolescent, PTSD, skoncentrowana na traumie, leczenie, psychotherapia, podręcznik

Name of translator: Marcin Rzeszutek, University of Finance and Management in Warsaw, Poland

**Citation:** European Journal of Psychotraumatology 2016, 7: 29246 - <http://dx.doi.org/10.3402/ejpt.v7.29246>
